# Supplementary material
Source: PubMed Central journal article supplement (PMC9630513)
Supplement: 41598_2022_21034_MOESM1_ESM.pdf [file 41598_2022_21034_MOESM1_ESM.pdf]

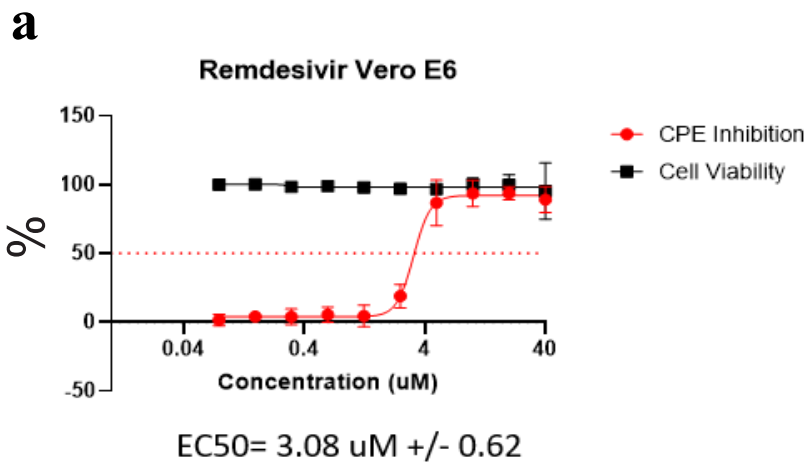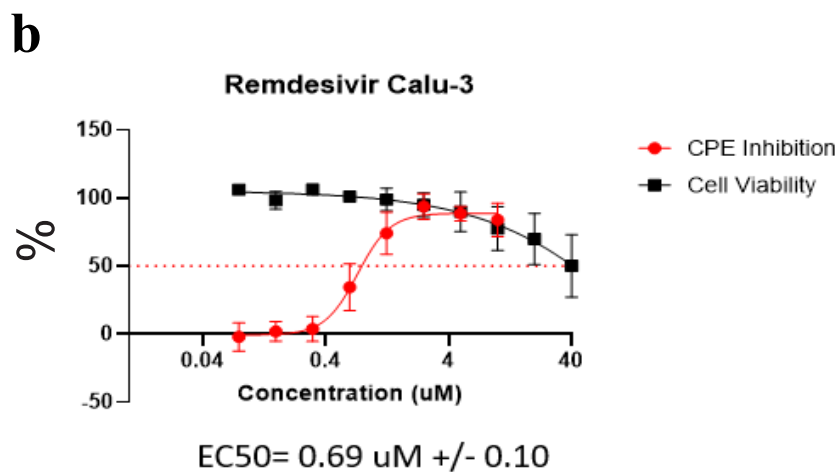

**Extended Data Figure 1. Remdesivir dose response curves averaged across all experiments in 384well assays in Vero E6 (a) and Calu-3 cells (b).** Error bars indicate standard deviation. CPE inhibition (%) in SARS-CoV-2 infected cells in red, Cell viability (%) in uninfected cells in black. Data represent n=3 for Vero-E6 cells and n=4 for Calu-3 cells.

**Bexarotene/RDV**  
(Retinoid)  
55% / 29

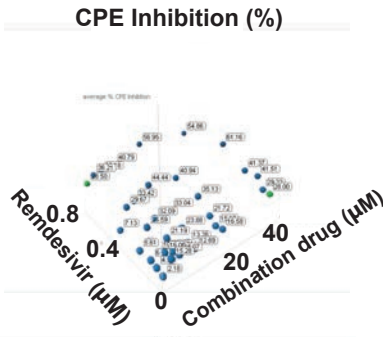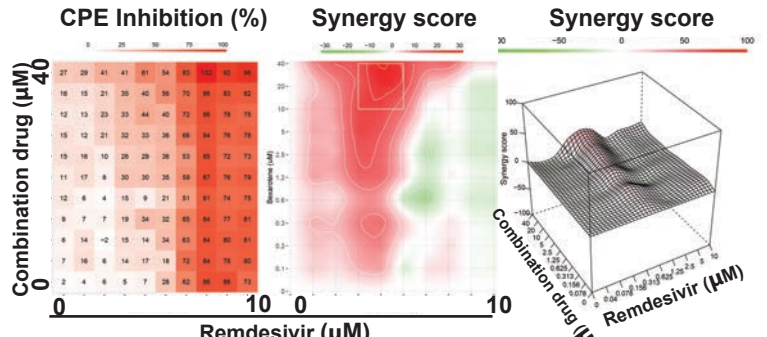

**Budesonide/RDV**  
(Corticosteroid)  
91% / 32 \*

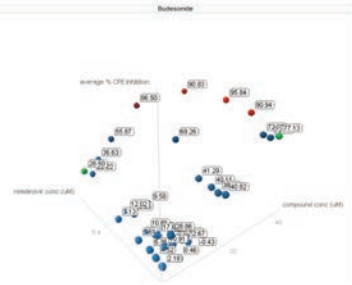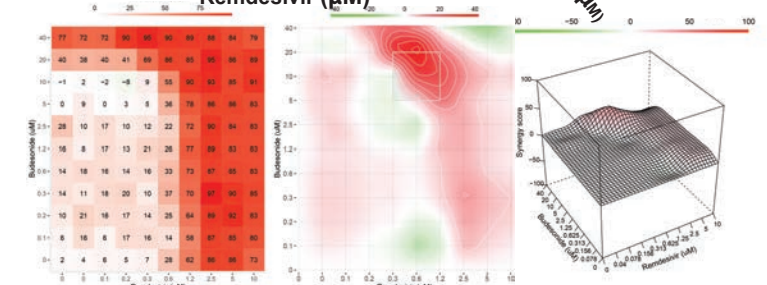

**Cilostazol/RDV**  
(PDE3 inhibitor)  
86% / 40 \*

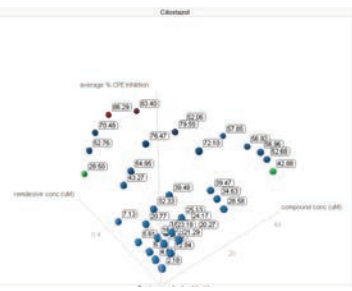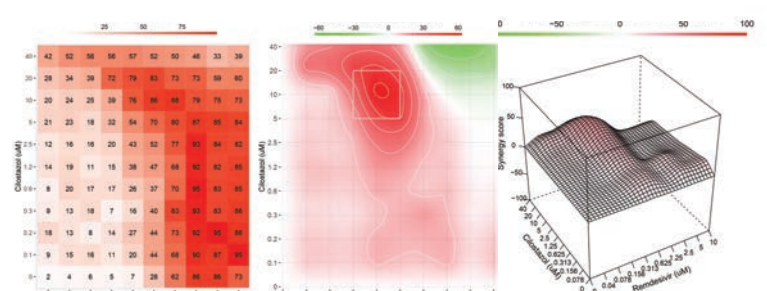

**Clobetasol propionate/RDV**  
(Corticosteroid)  
97% / 49 \*

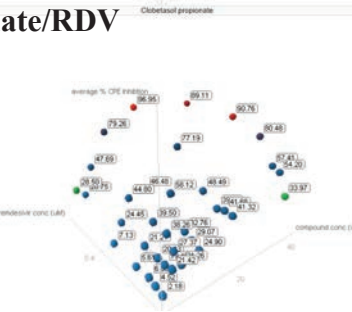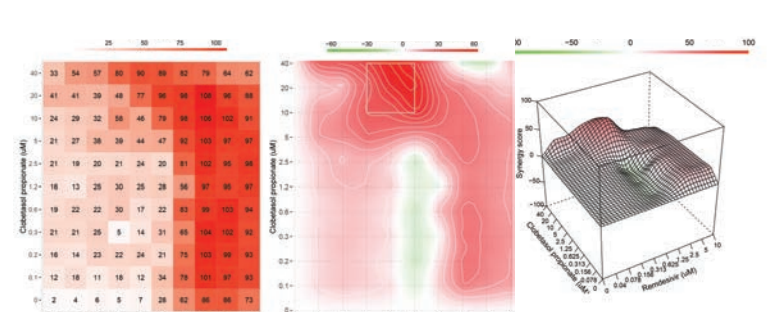

**Conivaptan/RDV**  
(Vasopressin antagonist)  
107% / 84 \*

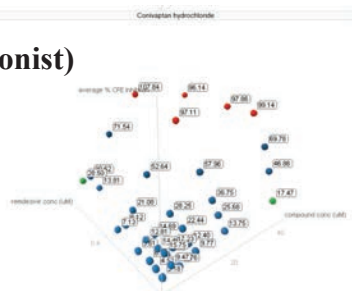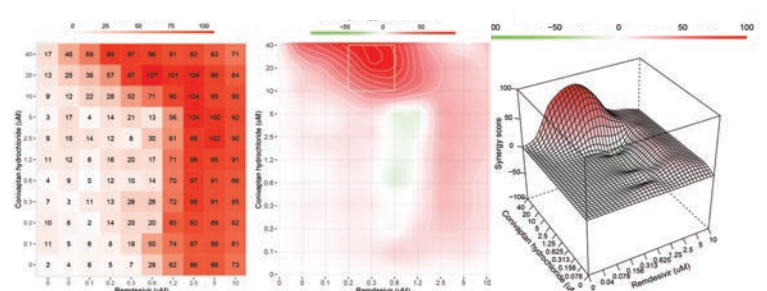

**Dabrafenib/RDV**  
(BRAF-Inhibitor)  
128% / 47 \*

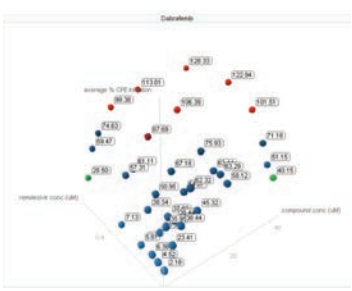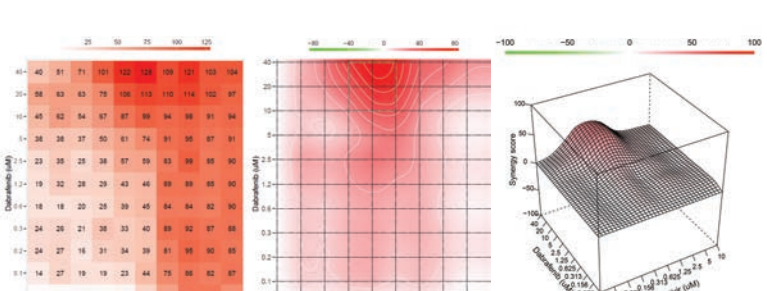



**Doxapram/RDV**  
 (IV Analeptic, K channel inh.)  
 76% / 44

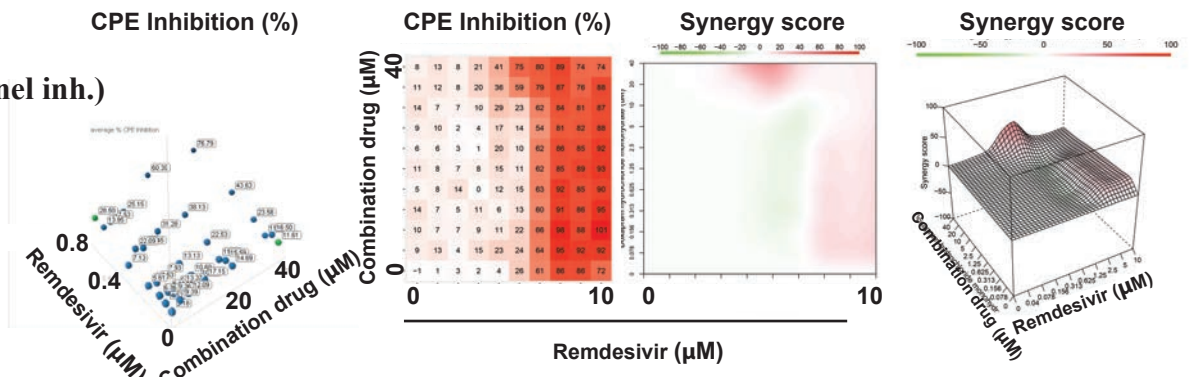

**Drosiprenone/RDV**  
 (Corticosteroid)  
 85% / 29 \*

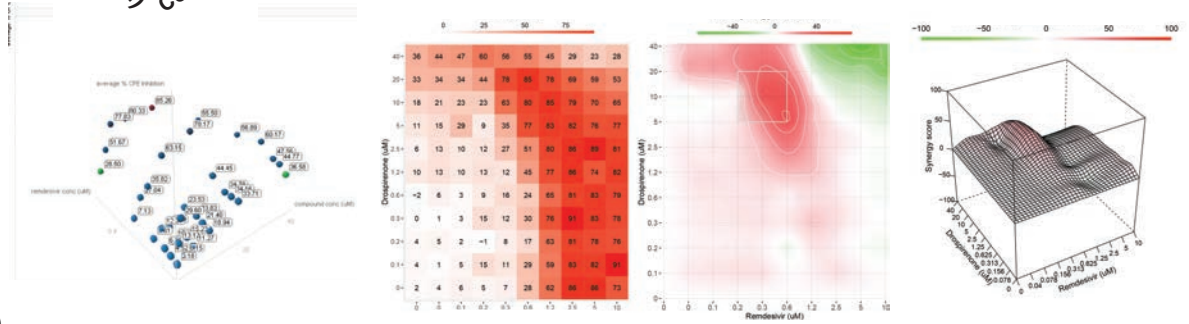

**Elbasvir/RDV**  
 (HCV NS5A inhibitor)  
 89% / 50 \*

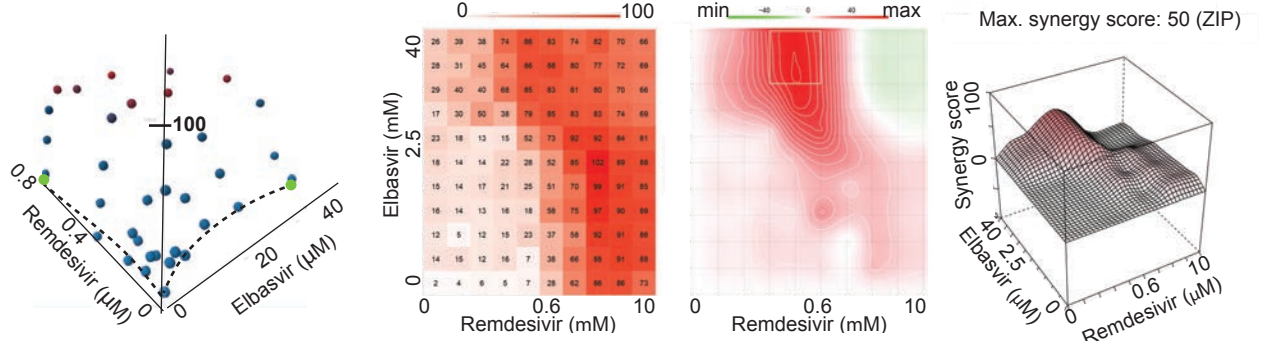

**Empagliflozin/RDV**  
 (SGLT2 Inhibitor)  
 82% / 40

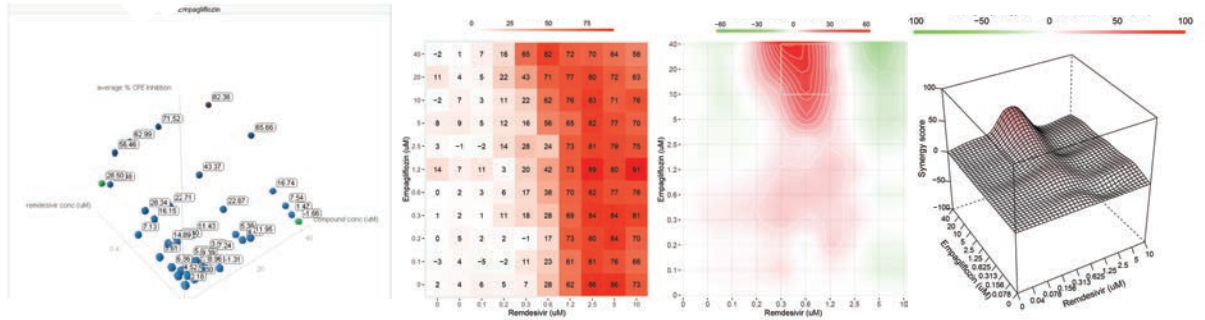

**Ezetimibe/RDV**  
 (Sterol transporter Inhibitor)  
 89% / 44 \*

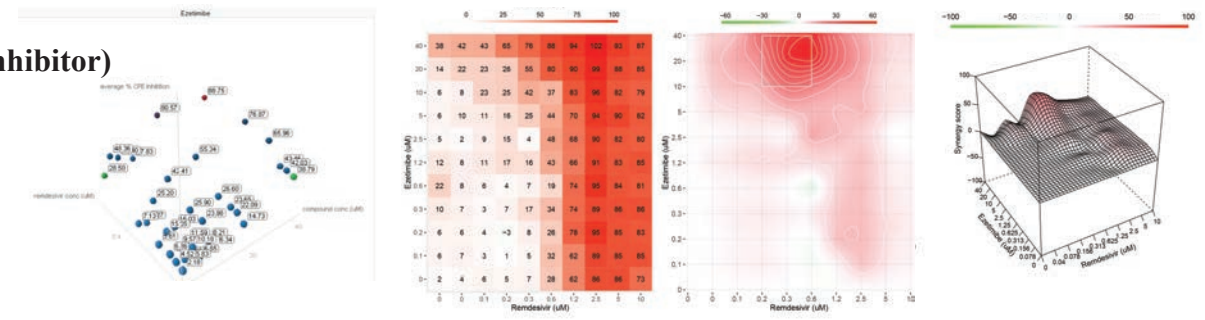

**Irbesartan/RDV**  
 (Angiotensin Receptor Blocker)  
 75% / 33

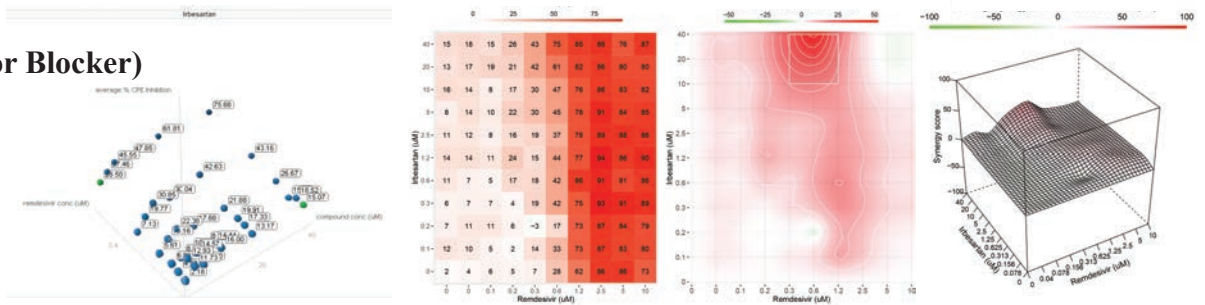

**Ivosidenib/RDV**  
**(IDH1 Inhibitor)**  
**99% / 65 \***

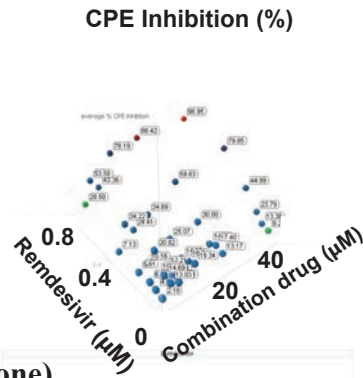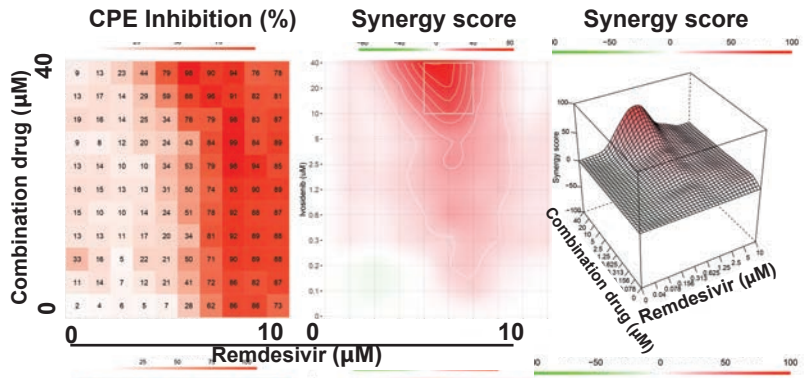

**Lumacaftor/RDV**  
**(Chemical chaperone)**  
**87% / 41**

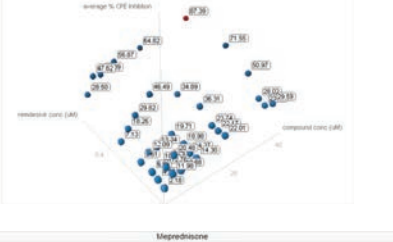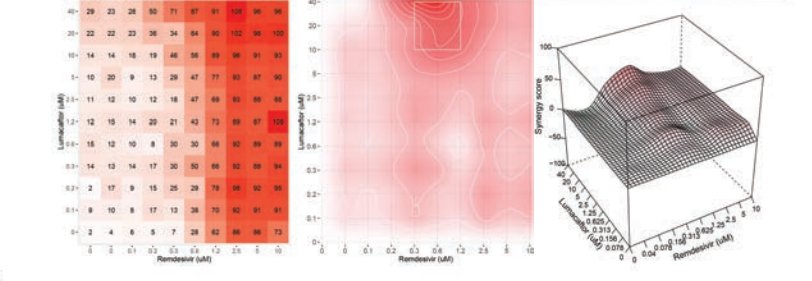

**Meprednisone/RDV**  
**(Glucocorticoid)**  
**81% / 49 \***

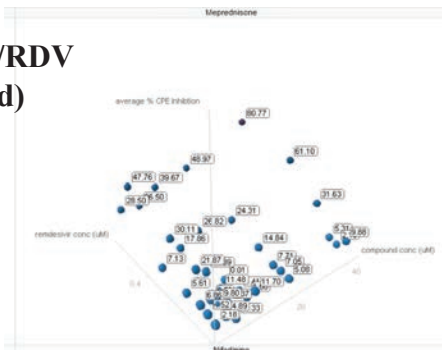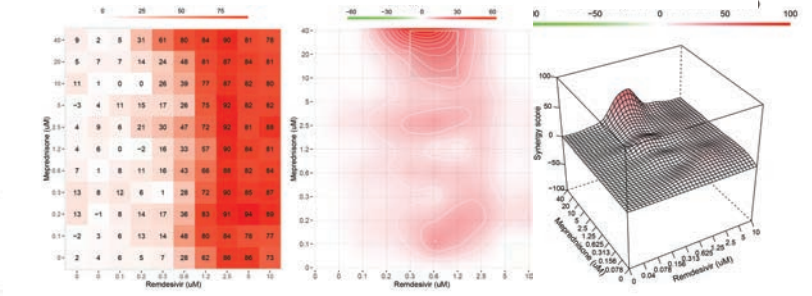

**Methylprednisolone/RDV**  
**(Glucocorticoid)**  
**72% / 22**

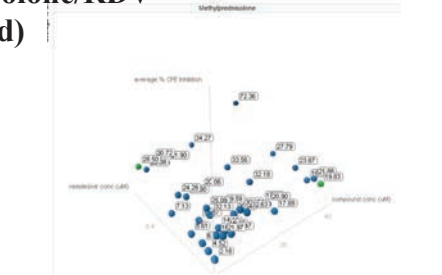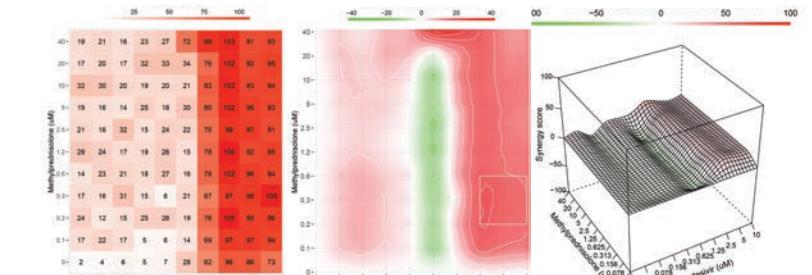

**Nifedipine/RDV**  
**(Ca channel antagonist)**  
**93% / 60 \***

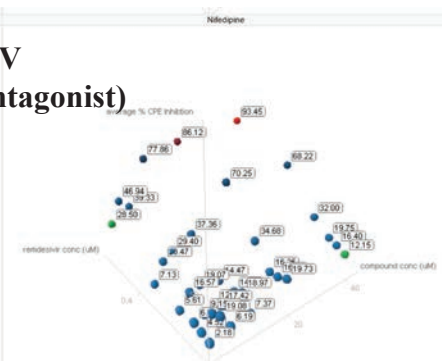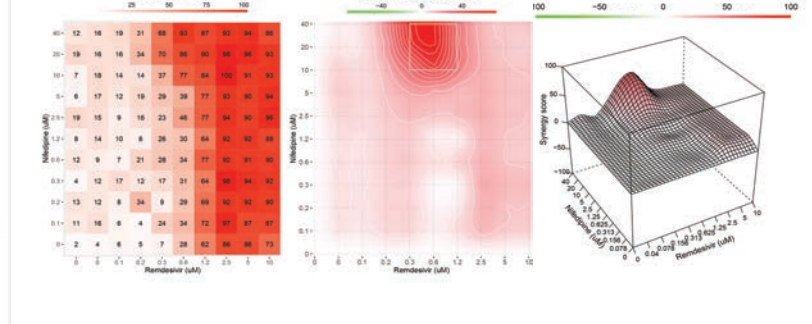

**Nimodipine/RDV**  
**(Ca channel antagonist)**  
**87% / 50 \***

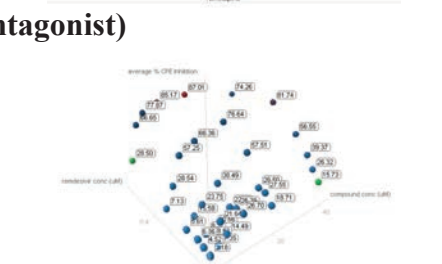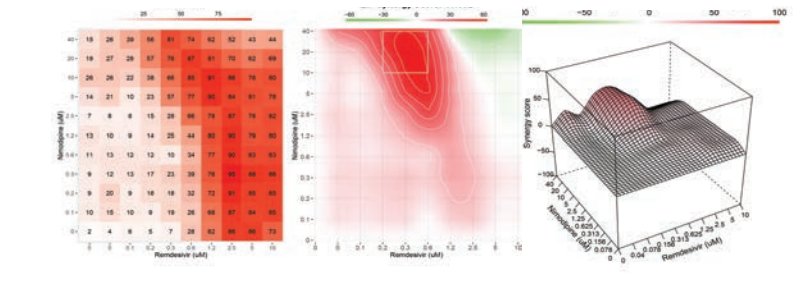



**Omeprazole sulfide/RDV**  
 (Proton pump inh. intermed.)  
 95% / 44 \*

CPE Inhibition (%)

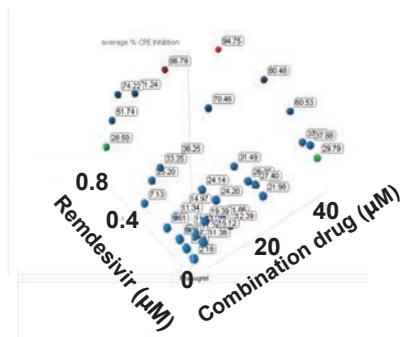

CPE Inhibition (%)

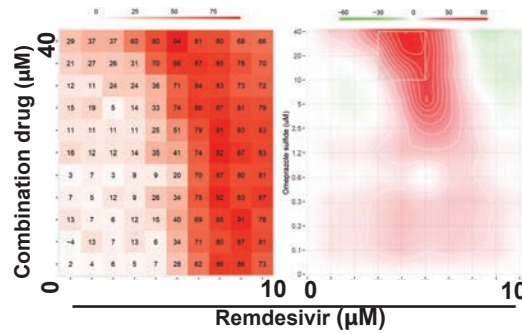

Synergy score

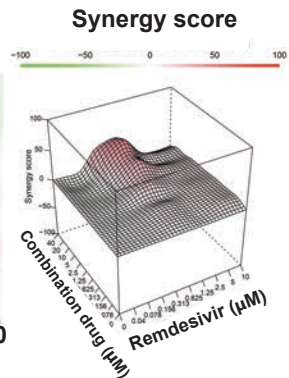

**Prasugrel/RDV**  
 (Platelet inhibitor)  
 83% / 28

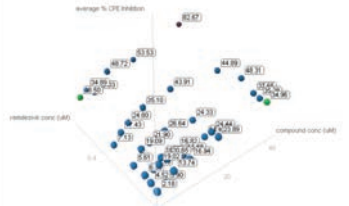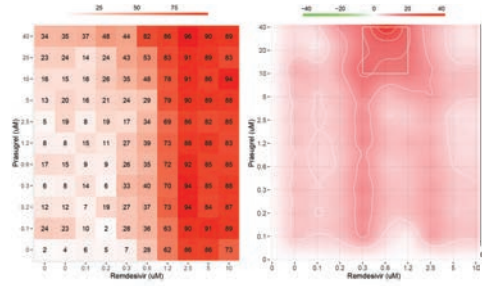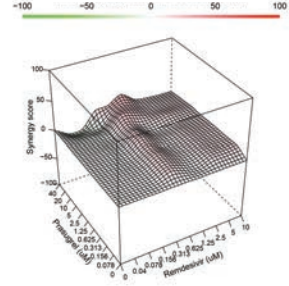

**Quinapril/RDV**  
 (ACE inhibitor)  
 85% / 53 \*

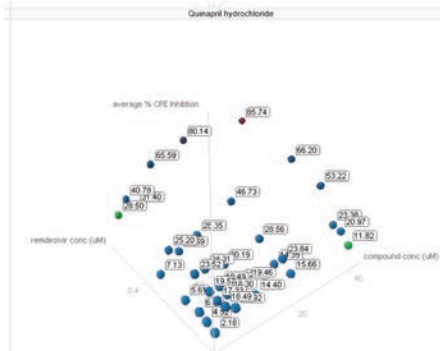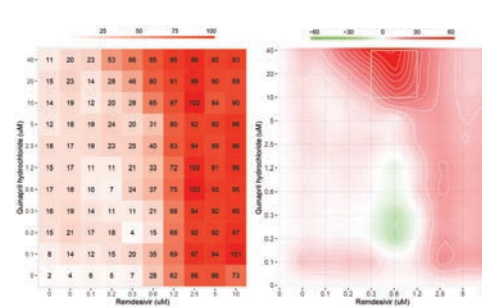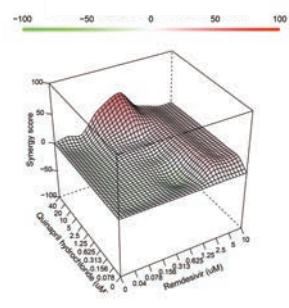

**Rifamycin/RDV**  
 (Antibiotic)  
 58% / 23

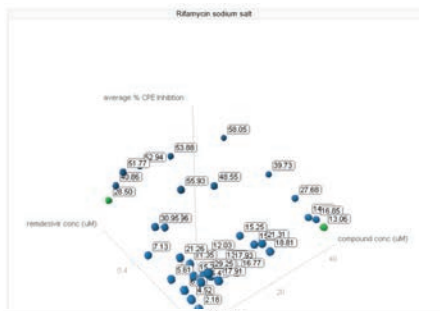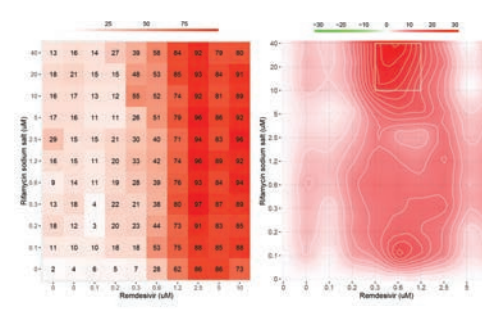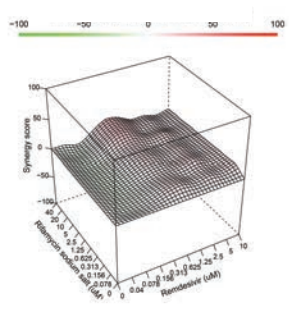

**Rifaximin/RDV**  
 (Antibiotic)  
 75% / 49 \*

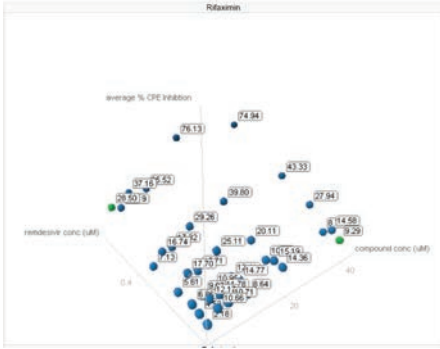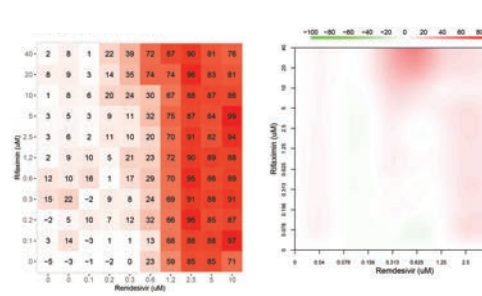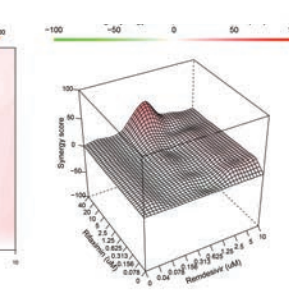

**Selexipag/RDV**  
 (Prostacyclin receptor agonist)  
 92% / 43 \*

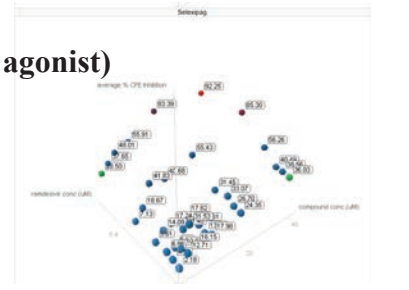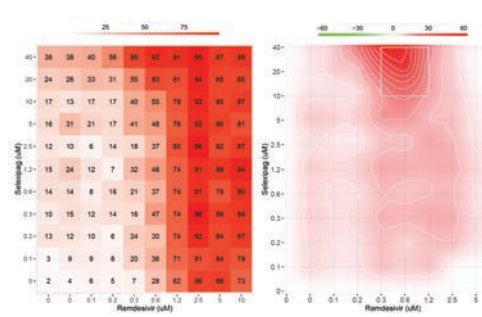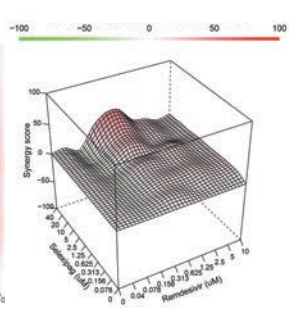

CPE Inhibition (%)

CPE Inhibition (%)

Synergy score

Synergy score

**Telmisartan/RDV**  
(Angiotensin receptor blocker)  
102% / 71 \*

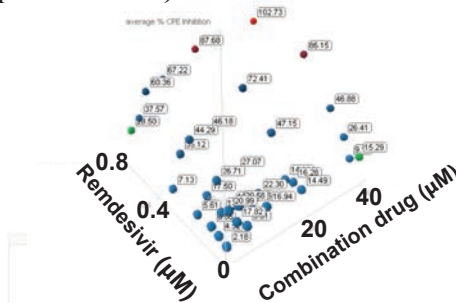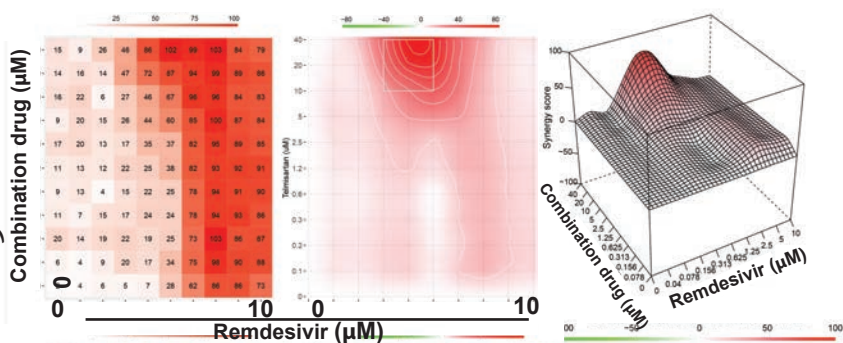

**Valdecoxib/RDV**  
(NSAID)  
84% / 29 \*

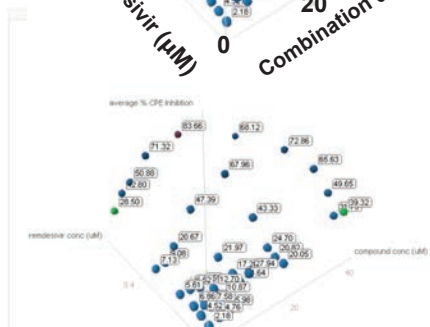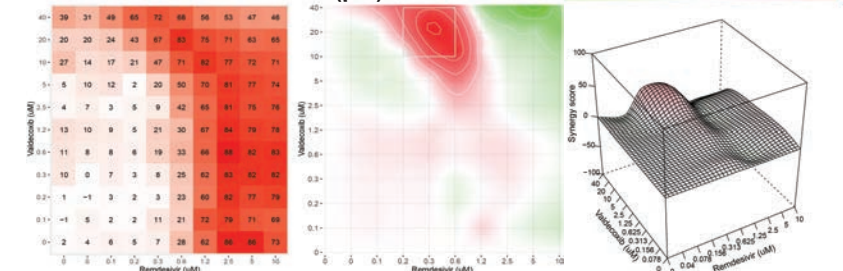

**Velpatasvir/RDV**  
(HCV NS5A inhibitor)  
108% / 85 \*

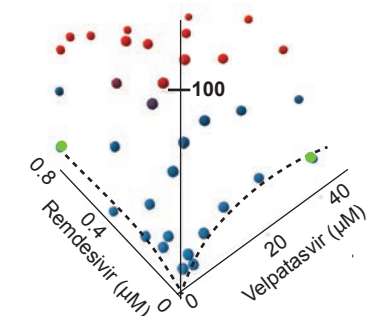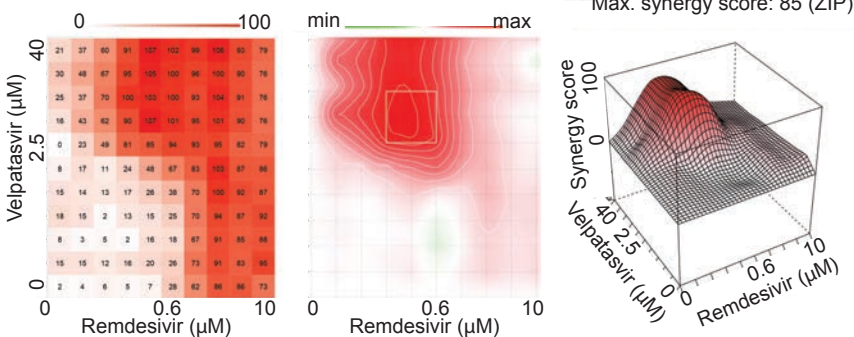

**Zafirlukast/RDV**  
(Leukotriene receptor antagonist)  
90% / 47 \*

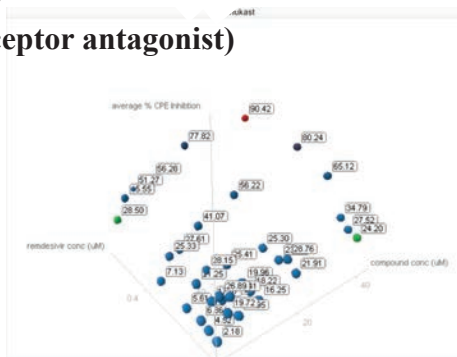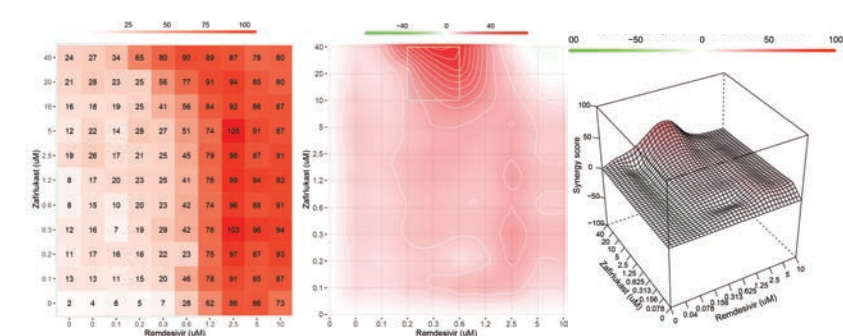

**Extended Data Figure 2. Dose response interaction matrix / synergy analysis for all dose response compound combinations. Left panel:** Three-dimensional plot showing synergy of combinations of labeled compound (x-axis, up to 40µM) and remdesivir (y-axis, up to 0.6µM). Z-axis indicates Inhibition of CPE (%). Markers are labeled with their respective Inhibition of CPE value; coloring gradient from blue (0% CPE inhibition) to red (100% CPE inhibition). Green – highest concentration of labeled compound and remdesivir alone. Maximum %CPE inhibition and maximum synergy score indicated under drug name. Asterisk indicates 20 prioritized compounds. **Middle left panel:** Two-dimensional representation of dose response interaction matrix. X-axis – Remdesivir (up to 10µM), y-axis: labeled compound (up to 40µM). Color gradient indicates Inhibition of CPE (%); white – 0%, red- 100%. **Middle right panel:** Topographic two-dimensional map of synergy scores determined in synergyfinder 33 from the data on the left, color gradient indicates synergy score (red – highest score). **Right panel:** Three-dimensional surface plot representing synergy score (z-axis) for each compound combination. X-axis: remdesivir up to 10µM, y-axis: labeled compound up to 40µM.



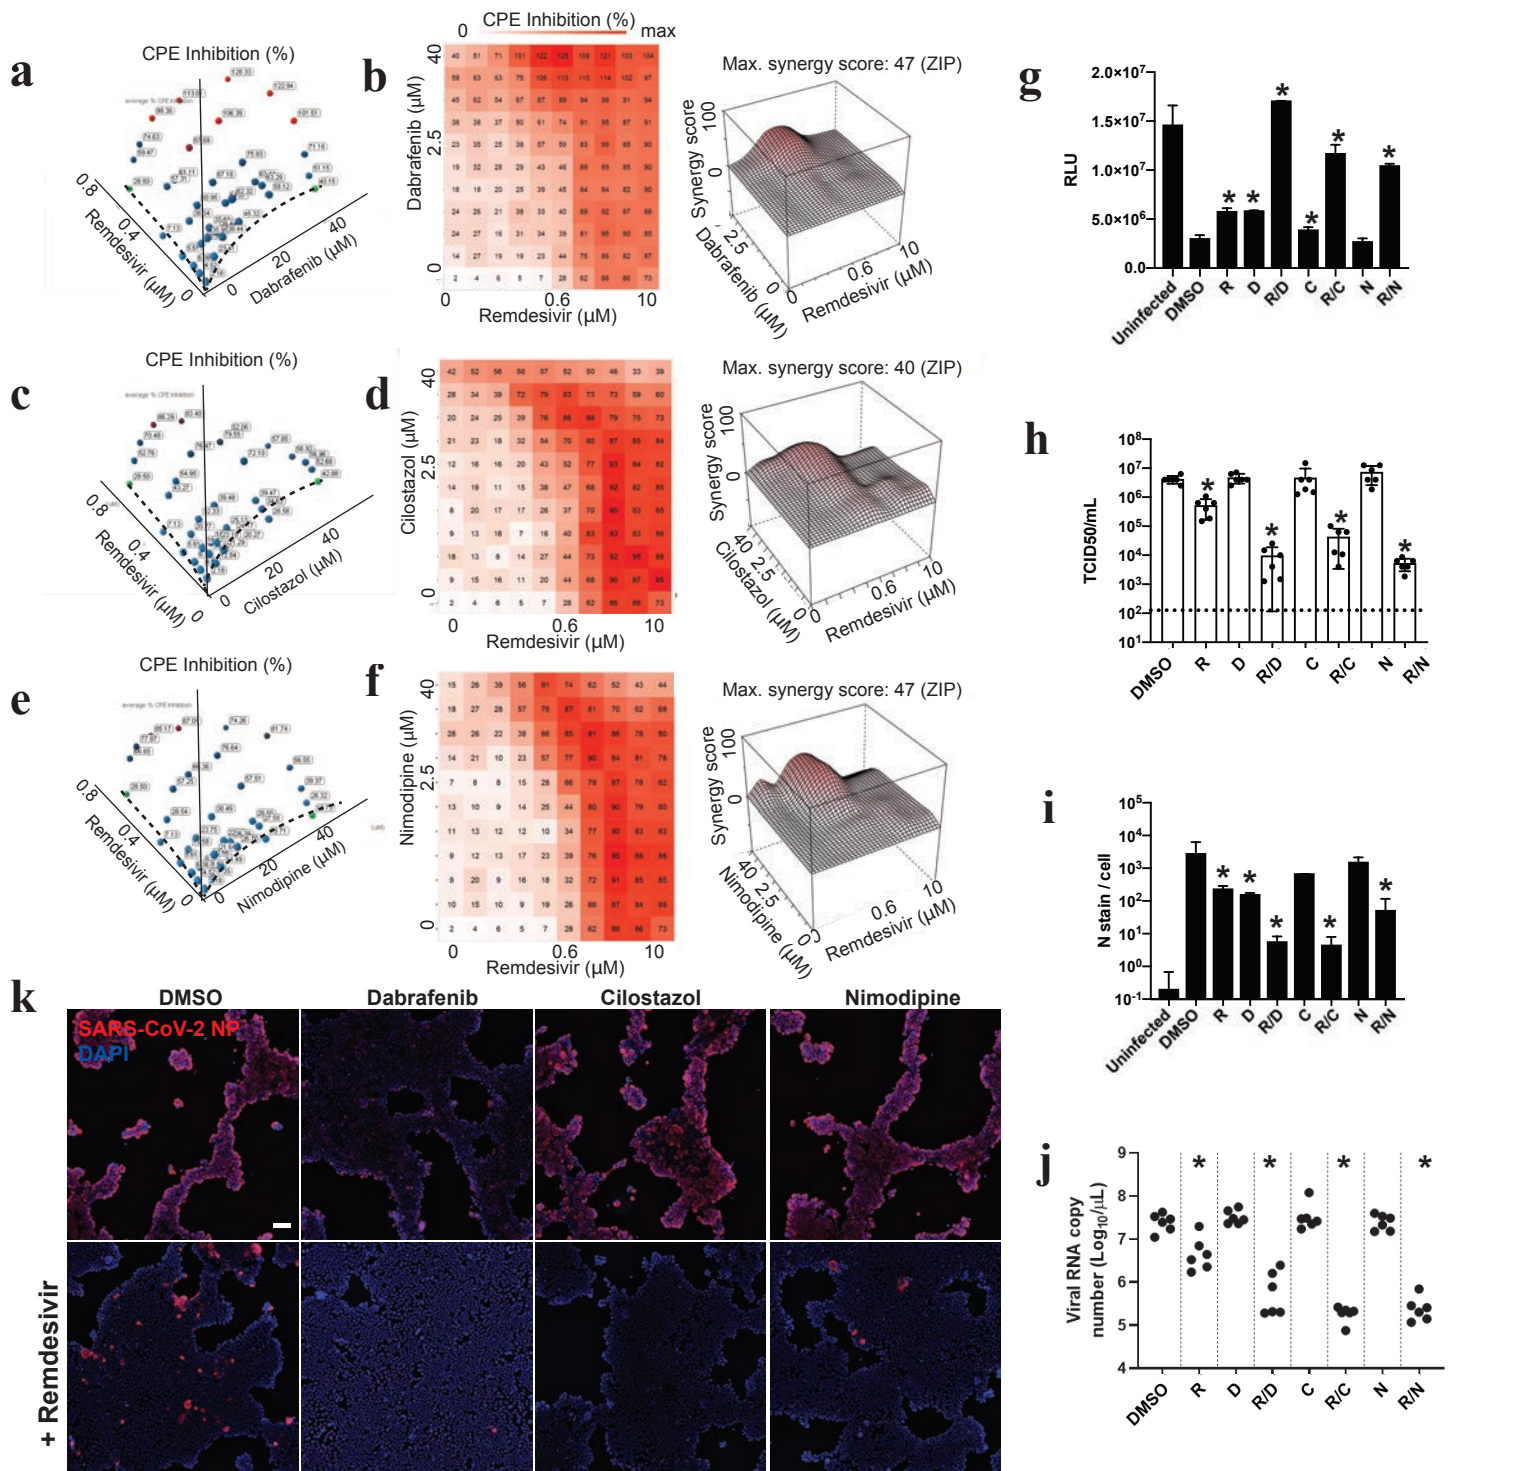

**Extended Data Figure 3. Synergy of dabrafenib, cilostazol and nimodipine with remdesivir in Calu-3 cells infected with SARS-CoV-2.** (a) (c) (e) Three-dimensional plot showing synergy of combinations of Dabrafenib (a), Cilostazol (c), Nimodipine (e) (x-axis, up to 40µM) and remdesivir (y-axis, up to 0.6µM). Z-axis indicates CPE Inhibition (%). Markers are labeled with their respective Inhibition of CPE value; coloring gradient from blue (0% CPE inhibition) to red (100% CPE inhibition). Green – highest concentration of tested drug and remdesivir alone, reaching ~20% Inhibition of CPE. Dashed line indicates dose response of each single agent. (b) (d) (f) Two-dimensional representation of dose response interaction matrix (left panel) and three-dimensional topographic map of synergy score (z-axis) over dose response matrix. X-axis – remdesivir (up to 10µM), y-axis: Dabrafenib (b), cilostazol (d), nimodipine (f) (up to 40µM). Color gradient indicates Inhibition of CPE (%); white – 0%, red- 100%. (g) (h) (i) (j) Confirmation of observed activities in orthogonal assays. R: remdesivir; D: dabrafenib; C: cilostazol; N: nimodipine (g) Cell-Titer Glo positive control, (h) TCID50 assay, (i) Immunofluorescence microscopy assay, quantified (j) RT-qPCR assay. Experimental conditions as in Figure 5. (k) Representative images from (i), Calu-3 cells infected with SARS-CoV-2 48hpi. Scale bar corresponds to 100µm.

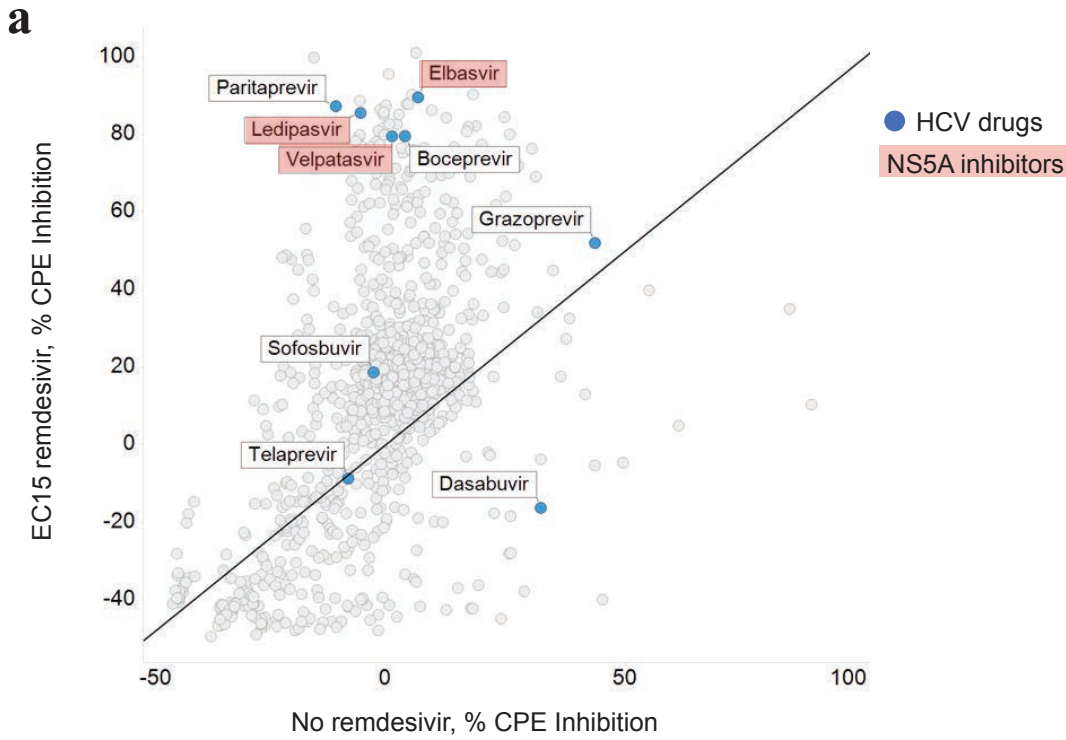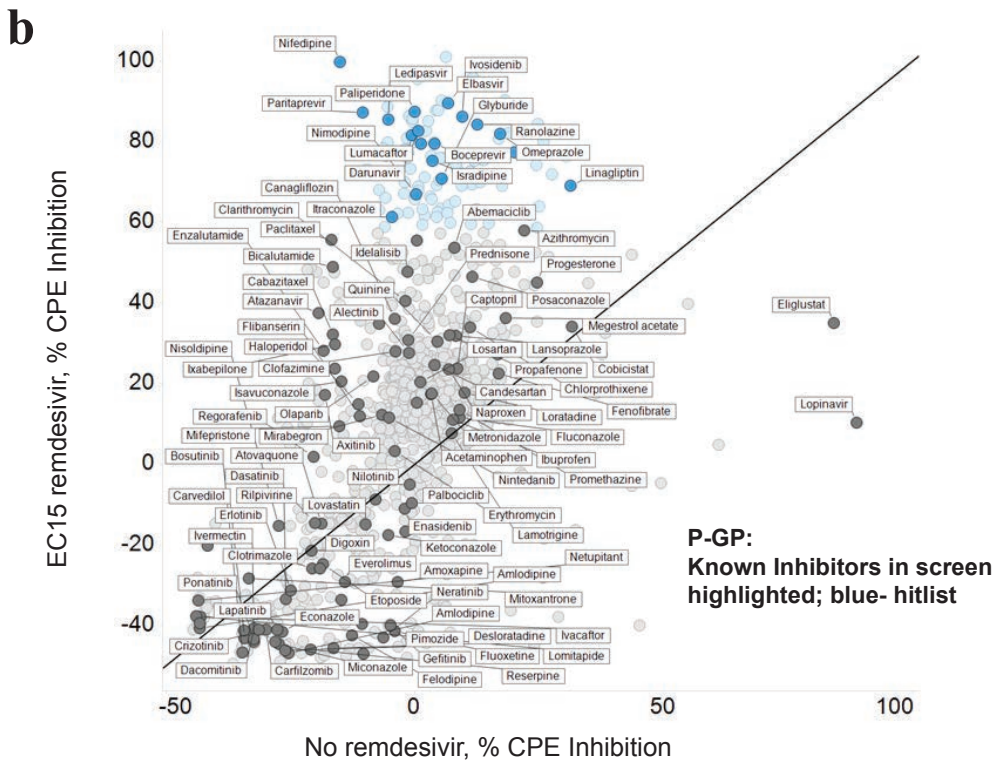

**Extended Data Figure 4. Distribution of NS5A and P-gp inhibitors in the dataset** (a) Screening data of all approved drugs in Vero-E6 cells infected with SARS-CoV-2, HCV drugs highlighted in blue, subset of NS5A inhibitors highlighted in red. Axes show inhibition of CPE (%), in absence (x) and presence (y) of EC15 of remdesivir. (b) as in (a), but with all known P-gp inhibitors highlighted, showing similar distribution in hitlist (blue) and inactive compounds (gray).



TABLE S1

| Molecule Name                      | Concentration | Primary synergy screen in Vero-E6 (Figure 1D, 1E) |                                        |                                      |                                        | Confirmatory synergy screen in Vero-E6 (Figure 1F) |                                        |                                      |                                        | Synergy screen in Calu3s (Figure 1G) |                                         | Synergy scores in Calu3 cells (Figure 3, Figure ED2) |                             |
|------------------------------------|---------------|---------------------------------------------------|----------------------------------------|--------------------------------------|----------------------------------------|----------------------------------------------------|----------------------------------------|--------------------------------------|----------------------------------------|--------------------------------------|-----------------------------------------|------------------------------------------------------|-----------------------------|
|                                    |               | % CPE Inhibition with OuM remdesivir              | Cell Viability (%) with OuM remdesivir | % CPE Inhibition with 1uM remdesivir | Cell Viability (%) with 1uM remdesivir | % CPE Inhibition with OuM remdesivir               | Cell Viability (%) with OuM remdesivir | % CPE Inhibition with 1uM remdesivir | Cell Viability (%) with 1uM remdesivir | % CPE Inhibition with OuM remdesivir | % CPE Inhibition with 0.15uM remdesivir | Synergy score                                        | Most synergistic area score |
| Alfuzosin hydrochloride            | 40uM          | 11.6                                              | 92.9                                   | 69.5                                 | 78.4                                   | -8.13                                              | 100.00                                 | 69.50                                | 78.40                                  | 7.17                                 | 12.5                                    |                                                      |                             |
| Aminocidine                        | 40uM          | -5.69                                             | 59.1                                   | 79.3                                 | 91                                     | -22.80                                             | 95.70                                  | 79.30                                | 91.00                                  | 12.1                                 | 35                                      |                                                      |                             |
| Ampronavir                         | 40uM          | -0.525                                            | 105                                    | 84.9                                 | 101                                    | -8.66                                              | 98.00                                  | 84.90                                | 101.00                                 | 12                                   | 58.1                                    |                                                      |                             |
| Apalutamide                        | 40uM          | 4.38                                              | 85.2                                   | 69.3                                 | 81.7                                   | -2.05                                              | 99.60                                  | 69.30                                | 81.70                                  | 16.5                                 | 30.5                                    |                                                      |                             |
| Betamethasone 17-valerate          | 40uM          | -0.867                                            | 51.7                                   | 73.3                                 | 79.7                                   | -20.90                                             | 97.10                                  | 73.30                                | 79.70                                  | 7.26                                 | 49.1                                    |                                                      |                             |
| Bevorotene                         | 40uM          | 14.2                                              | 78.5                                   | 76.7                                 | 82.5                                   | 8.38                                               | 112.00                                 | 76.70                                | 82.50                                  | 23                                   | 75.7                                    | 5                                                    | 19                          |
| Boceprevir                         | 40uM          | 3.89                                              | 69.8                                   | 79.5                                 | 85.1                                   | -12.90                                             | 104.00                                 | 79.50                                | 85.10                                  | 14.4                                 | 39.7                                    |                                                      |                             |
| Budesonide                         | 40uM          | -5.41                                             | 66                                     | 79.8                                 | 82                                     | -34.50                                             | 90.60                                  | 79.80                                | 82.00                                  | 74.1                                 | 72.1                                    | 4                                                    | 17                          |
| Calcifediol                        | 40uM          | 5.3                                               | 107                                    | 63.4                                 | 92.4                                   | -2.76                                              | 106.00                                 | 63.40                                | 92.40                                  | 17.6                                 | 34.7                                    |                                                      |                             |
| Chloroquine diphosphate            | 40uM          | 24.9                                              | 87.2                                   | 63.9                                 | 76.6                                   | 71.30                                              | 101.00                                 | 63.90                                | 76.60                                  | 10.5                                 | 8.98                                    |                                                      |                             |
| Clozapine                          | 40uM          | 4.93                                              | 61.1                                   | 70.4                                 | 71.3                                   | -6.42                                              | 106.00                                 | 70.40                                | 71.30                                  | 12                                   | 64.5                                    | 10                                                   | 36                          |
| Cisapride                          | 40uM          | 4.26                                              | 74                                     | 87.8                                 | 90.4                                   | -25.80                                             | 103.00                                 | 87.80                                | 90.40                                  | 7.08                                 | 20.5                                    |                                                      |                             |
| Clevidipine butyrate               | 40uM          | 2.21                                              | 91.5                                   | 82.6                                 | 86                                     | -25.80                                             | 99.80                                  | 82.60                                | 86.00                                  | 11.9                                 | 41.7                                    |                                                      |                             |
| Clemastine fumarate                | 40uM          | 0.474                                             | 85                                     | 95.6                                 | 86.5                                   | -16.30                                             | 108.00                                 | 95.60                                | 86.50                                  | 8.38                                 | 44.8                                    |                                                      |                             |
| Clobetasol propionate              | 40uM          | -1.64                                             | 79.7                                   | 76.2                                 | 81.4                                   | -22.80                                             | 90.90                                  | 76.20                                | 81.40                                  | 45                                   | 79.3                                    | 14                                                   | 41                          |
| Convaptan hydrochloride            | 40uM          | -7.13                                             | 82.5                                   | 68                                   | 81.7                                   | -17.30                                             | 92.80                                  | 68.00                                | 81.70                                  | 23.4                                 | 90                                      | 14                                                   | 59                          |
| Dabigatran etexilate               | 40uM          | 18.7                                              | 62.3                                   | 82.2                                 | 88.4                                   | 55.50                                              | 112.00                                 | 62.30                                | 88.40                                  | 11.2                                 | 28.6                                    |                                                      |                             |
| Dabrafenib                         | 40uM          | 25.8                                              | 67.7                                   | 80                                   | 89.8                                   | 74.40                                              | 112.00                                 | 80.00                                | 89.80                                  | 16.5                                 | 109                                     | 18                                                   | 56                          |
| Darunavir                          | 40uM          | -0.58                                             | 68.2                                   | 81.6                                 | 85.7                                   | -15.20                                             | 108.00                                 | 81.60                                | 85.70                                  | 15.6                                 | 58                                      |                                                      |                             |
| Deflazacort                        | 40uM          | 6.83                                              | 91.4                                   | 64.3                                 | 78.3                                   | -7.32                                              | 95.20                                  | 64.30                                | 78.30                                  | 2.42                                 | 44.6                                    |                                                      |                             |
| Dieneogest                         | 40uM          | 1.4                                               | 87.9                                   | 62.3                                 | 76.4                                   | 4.73                                               | 103.00                                 | 62.30                                | 76.40                                  | 4.91                                 | 27.4                                    |                                                      |                             |
| Doxapram hydrochloride monohydrate | 40uM          | -5.45                                             | 88                                     | 88.7                                 | 85.7                                   | -29.60                                             | 101.00                                 | 88.70                                | 85.70                                  | 7.05                                 | 54.7                                    |                                                      |                             |
| Drospirodo                         | 40uM          | -1.14                                             | 79.1                                   | 86.3                                 | 79.9                                   | 3.66                                               | 113.00                                 | 86.30                                | 79.90                                  | 2.44                                 | 16.8                                    |                                                      |                             |
| Drosiprenone                       | 40uM          | 6.31                                              | 49.9                                   | 101                                  | 87.7                                   | -13.00                                             | 92.50                                  | 101.00                               | 87.70                                  | 8.92                                 | 85.4                                    | 4                                                    | 25                          |
| Dutasteride                        | 40uM          | -7.14                                             | 66.6                                   | 63                                   | 81.2                                   | -18.50                                             | 95.00                                  | 63.00                                | 81.20                                  | 21.5                                 | 36                                      |                                                      |                             |
| Dypyridamole                       | 40uM          | 13.8                                              | 78.4                                   | 75.4                                 | 79.5                                   | -9.44                                              | 104.00                                 | 75.40                                | 79.50                                  | 9.69                                 | 65.2                                    |                                                      |                             |
| Elbasvir                           | 40uM          | 6.7                                               | 101                                    | 89.5                                 | 92.1                                   | -11.70                                             | 97.40                                  | 89.50                                | 92.10                                  | 17.4                                 | 69.3                                    | 13                                                   | 49                          |
| Empagliflozin                      | 40uM          | 8.49                                              | 86.1                                   | 73.2                                 | 67.9                                   | -2.56                                              | 101.00                                 | 73.20                                | 67.90                                  | 5.76                                 | 69.3                                    | 4                                                    | 28                          |
| Erythromycin ethylsuccinate        | 40uM          | -1.98                                             | 83.5                                   | 78                                   | 84                                     | -14.20                                             | 104.00                                 | 78.00                                | 84.00                                  | 13                                   | 44.5                                    |                                                      |                             |
| Esomeprazole Magnesium             | 40uM          | 18.1                                              | 63                                     | 90.2                                 | 96.9                                   | 9.35                                               | 111.00                                 | 90.20                                | 96.90                                  | 37.4                                 | 65.9                                    |                                                      |                             |
| Ezetimibe                          | 40uM          | 0.679                                             | 78.6                                   | 68.9                                 | 75.5                                   | -9.40                                              | 101.00                                 | 68.90                                | 75.50                                  | 13.8                                 | 67.8                                    | 8                                                    | 31                          |
| Ezetimibe                          | 40uM          | 3.08                                              | 72.3                                   | 66.5                                 | 71                                     | -6.72                                              | 95.10                                  | 66.50                                | 71.00                                  | 18.2                                 | 17.6                                    |                                                      |                             |
| Fidaxomicin                        | 40uM          | 4.63                                              | 67.9                                   | 87.8                                 | 86.4                                   | 17.10                                              | 99.90                                  | 87.80                                | 86.40                                  | 13.7                                 | 54.7                                    |                                                      |                             |
| Finasteride                        | 40uM          | 11.1                                              | 85.2                                   | 72.6                                 | 72                                     | -9.08                                              | 92.90                                  | 72.60                                | 72.00                                  | 10.4                                 | 6.3                                     |                                                      |                             |
| Fulvestrant                        | 40uM          | -1.68                                             | 83.5                                   | 80.8                                 | 84                                     | -19.50                                             | 105.00                                 | 80.80                                | 84.00                                  | 0.341                                | 37.4                                    |                                                      |                             |
| Glyburide                          | 40uM          | 5.42                                              | 62.1                                   | 70.8                                 | 76.3                                   | -10.60                                             | 99.80                                  | 70.80                                | 76.30                                  | 4.55                                 | 33.8                                    |                                                      |                             |
| Hydroxychloroquine sulfate         | 40uM          | 17.6                                              | 49.4                                   | 69.1                                 | 97.9                                   | 35.40                                              | 104.00                                 | 69.10                                | 97.90                                  | 6.32                                 | 19.3                                    |                                                      |                             |
| Imiquimod                          | 40uM          | -2.1                                              | 60.2                                   | 69.9                                 | 81.4                                   | -8.31                                              | 105.00                                 | 69.90                                | 81.40                                  | 6.18                                 | 29.5                                    |                                                      |                             |
| Indacaterol maleate                | 40uM          | 4.5                                               | 55.5                                   | 62.6                                 | 71.4                                   | -17.80                                             | 97.20                                  | 62.60                                | 71.40                                  | 4.4                                  | 2.31                                    |                                                      |                             |
| Irbesartan                         | 40uM          | 12.1                                              | 89.9                                   | 71.6                                 | 88                                     | -9.93                                              | 98.00                                  | 71.60                                | 88.00                                  | 12.6                                 | 82.3                                    | 7                                                    | 24                          |
| Isradipine                         | 40uM          | 3.52                                              | 49.5                                   | 75.3                                 | 78.5                                   | -31.10                                             | 97.60                                  | 75.30                                | 78.50                                  | 14.7                                 | 30.6                                    |                                                      |                             |
| Ivabradine hydrochloride           | 40uM          | 0.608                                             | 57.2                                   | 67.9                                 | 91.2                                   | -21.40                                             | 103.00                                 | 67.90                                | 91.20                                  | 5.01                                 | 29.3                                    |                                                      |                             |
| Ivosidenib                         | 40uM          | 9.55                                              | 90.4                                   | 86.1                                 | 85.8                                   | 17.20                                              | 100.00                                 | 86.10                                | 85.80                                  | 4.48                                 | 98.4                                    | 11                                                   | 45                          |
| Ledipapir                          | 40uM          | -5.28                                             | 103                                    | 85.5                                 | 86.4                                   | -41.00                                             | 96.80                                  | 85.50                                | 86.40                                  | 23.8                                 | 68.9                                    |                                                      |                             |
| Lenvatinib                         | 40uM          | -5.85                                             | 81.7                                   | 66.1                                 | 79.3                                   | -22.20                                             | 99.90                                  | 66.10                                | 79.30                                  | 15.4                                 | 21.1                                    |                                                      |                             |
| Linagliptin                        | 40uM          | 31.3                                              | 82.3                                   | 69                                   | 78.4                                   | 16.70                                              | 105.00                                 | 69.00                                | 78.40                                  | 0.757                                | 22.3                                    |                                                      |                             |
| Loteprednol etabonate              | 40uM          | 2.02                                              | 78.1                                   | 71.2                                 | 82.9                                   | -41.60                                             | 100.00                                 | 71.20                                | 82.90                                  | 6.54                                 | 27.8                                    |                                                      |                             |
| Luliconazole                       | 40uM          | 11.9                                              | 91.1                                   | 75.3                                 | 94.7                                   | -6.93                                              | 102.00                                 | 75.30                                | 94.70                                  | 16.9                                 | 31.9                                    |                                                      |                             |
| Lumacaftor                         | 40uM          | 0.673                                             | 94.2                                   | 82.6                                 | 94.7                                   | -4.63                                              | 104.00                                 | 82.60                                | 94.70                                  | 2.1                                  | 86.8                                    | 12                                                   | 29                          |
| Lurasidone hydrochloride           | 40uM          | -11                                               | 67.8                                   | 71.7                                 | 81.9                                   | -22.50                                             | 101.00                                 | 71.70                                | 81.90                                  | 9.38                                 | 21.6                                    |                                                      |                             |
| Macitentan                         | 40uM          | -19.4                                             | 66.2                                   | 82.2                                 | 105                                    | -30.70                                             | 109.00                                 | 82.20                                | 105.00                                 | 4.53                                 | 39.3                                    |                                                      |                             |
| Medrysone                          | 40uM          | -5.82                                             | 45.7                                   | 76.5                                 | 83.5                                   | -15.70                                             | 100.00                                 | 76.50                                | 83.50                                  | 13.5                                 | 27.5                                    |                                                      |                             |
| Meprednisone                       | 40uM          | -5.08                                             | 77.8                                   | 76.8                                 | 85.1                                   | -28.80                                             | 98.90                                  | 76.80                                | 85.10                                  | 5.81                                 | 77.5                                    | 7                                                    | 25                          |
| Methylprednisolone                 | 40uM          | 3.4                                               | 86.5                                   | 65.8                                 | 82.9                                   | -3.04                                              | 99.50                                  | 65.80                                | 82.90                                  | 1.32                                 | 88.9                                    | 7                                                    | 17                          |
| Nandrolone decanoate               | 40uM          | 5.45                                              | 88                                     | 90.3                                 | 78.5                                   | -10.70                                             | 102.00                                 | 90.30                                | 78.50                                  | 16.3                                 | 29.1                                    |                                                      |                             |
| Nifedipine                         | 40uM          | -15                                               | 40.4                                   | 99.8                                 | 92.4                                   | -58.10                                             | 71.00                                  | 99.80                                | 92.40                                  | 11.7                                 | 80.3                                    | 12                                                   | 43                          |
| Nimodipine                         | 40uM          | 0.237                                             | 77.2                                   | 66.9                                 | 74.6                                   | -22.50                                             | 102.00                                 | 66.90                                | 74.60                                  | 19.8                                 | 70.5                                    | 10                                                   | 43                          |
| Nizatidine                         | 40uM          | 3.28                                              | 57.7                                   | 76.4                                 | 82.3                                   | -13.40                                             | 103.00                                 | 76.40                                | 82.30                                  | 8.59                                 | 25.1                                    |                                                      |                             |
| Omeprazole                         | 40uM          | 17.1                                              | 83.9                                   | 81.9                                 | 90.6                                   | -3.03                                              | 106.00                                 | 81.90                                | 90.60                                  | 16.4                                 | 30.7                                    |                                                      |                             |
| Omeprazole sulfide                 | 40uM          | 16.8                                              | 89.8                                   | 80.7                                 | 89                                     | -2.28                                              | 99.00                                  | 80.70                                | 89.00                                  | 15.4                                 | 77.1                                    | 7                                                    | 32                          |
| Ondansetron hydrochloride          | 40uM          | 24.7                                              | 104                                    | 84.5                                 | 92                                     | 20.00                                              | 96.40                                  | 84.50                                | 92.00                                  | 7.3                                  | 10.1                                    |                                                      |                             |
| Paliperidone                       | 40uM          | -0.104                                            | 57.1                                   | 87.4                                 | 82.6                                   | -12.60                                             | 97.80                                  | 87.40                                | 82.60                                  | 10.6                                 | 20.3                                    |                                                      |                             |
| Paritaprevir                       | 40uM          | -10.5                                             | 61.2                                   | 87.2                                 | 94.6                                   | 3.56                                               | 109.00                                 | 87.20                                | 94.60                                  | 9.65                                 | 20.4                                    |                                                      |                             |
| Pazopanib                          | 40uM          | 11.7                                              | 65.5                                   | 95.8                                 | 90.9                                   | -6.84                                              | 102.00                                 | 95.80                                | 90.90                                  | 2.37                                 | 29.9                                    |                                                      |                             |
| Permethrin                         | 40uM          | 30.4                                              | 76.6                                   | 76.3                                 | 85.4                                   | 17.10                                              | 103.00                                 | 76.30                                | 85.40                                  | 27.2                                 | 57.4                                    |                                                      |                             |
| Phenoxybenzamine hydrochloride     | 40uM          | -1.32                                             | 48.3                                   | 62.4                                 | 80.6                                   | -17.60                                             | 102.00                                 | 62.40                                | 80.60                                  | 8.46                                 | 22.2                                    |                                                      |                             |
| Phenylbutazone                     | 40uM          | 7.76                                              | 87.3                                   | 76.5                                 | 88.8                                   | -6.46                                              | 110.00                                 | 76.50                                | 88.80                                  | 7.29                                 | 69.6                                    |                                                      |                             |
| Prasugrel                          | 40uM          | -0.407                                            | 51.1                                   | 85.7                                 | 95.2                                   | -3.18                                              | 112.00                                 | 85.70                                | 95.20                                  | 3.31                                 | 57.2                                    | 8                                                    | 17                          |
| Quinagril hydrochloride            | 40uM          | 2.71                                              | 66.2                                   | 85.2                                 | 87.8                                   | -3.03                                              | 116.00                                 | 85.20                                | 87.80                                  | 9.11                                 | 88.6                                    | 10                                                   | 35                          |
| Quinidine hydrochloride            | 40uM          | 27.6                                              | 83.5                                   | 71.9                                 | 88.8                                   | 27.20                                              | 100.00                                 | 71.90                                | 88.80                                  | 9.25                                 | 23.6                                    |                                                      |                             |
| Ranolazine                         | 40uM          | 12.6                                              | 109                                    | 80.9                                 | 90.7                                   | -19.10                                             | 105.00                                 | 84.30                                | 90.70                                  | 9.99                                 | 19.2                                    |                                                      |                             |
| Ranolazine dihydrochloride         | 40uM          | -3.12                                             | 54.5                                   | 76.6                                 | 88.4                                   | -26.10                                             | 104.00                                 | 76.60                                | 88.40                                  | 9.44                                 | 19.1                                    |                                                      |                             |
| Rebeprazole sodium                 | 40uM          | 1.58                                              | 59.8                                   | 63.2                                 | 66.8                                   | -13.30                                             | 93.80                                  | 63.20                                | 66.80                                  | 28.8                                 | 30.1                                    |                                                      |                             |
| Rifamycin sodium                   | 40uM          | 8.07                                              | 89.5                                   | 65.1                                 | 71.1                                   | -2.41                                              | 100.00                                 | 65.10                                | 71.10                                  | 4.08                                 | 93.5                                    | 8                                                    | 20                          |
| Risperdal                          | 40uM          | -2.2                                              | 82                                     | 67.2                                 | 92.7                                   | -26.10                                             | 98.00                                  | 67.20                                | 92.70                                  | 8.29                                 | 28.4                                    |                                                      |                             |
| Selexipag                          | 40uM          | 9.43                                              | 62.1                                   | 69                                   | 71.7                                   | -12.40                                             | 104.00                                 | 69.00                                | 71.70                                  | 31.4                                 | 20.4                                    | 9                                                    | 29                          |
| Sildenafil citrate                 | 40uM          | 5.81                                              | 90.7                                   | 76                                   | 80.8                                   | -32.40                                             | 90.10                                  | 76.00                                | 80.80                                  | 1.98                                 | 26.2                                    |                                                      |                             |
| Sildenafil citrate                 | 40uM          | 0.0161                                            | 93                                     | 65.7                                 | 84.9                                   | -12.70                                             | 89.70                                  | 65.70                                | 84.90                                  | 5.51                                 | 16.5                                    |                                                      |                             |
| Tacrine hydrochloride hydrate      | 40uM          | 6.53                                              | 85.4                                   | 62.3                                 | 84.4                                   | 33.10                                              | 94.90                                  | 62.30                                | 84.40                                  | 5.74                                 | 19.8                                    |                                                      |                             |
| Tamsulosin hydrochloride           | 40uM          | 5.14                                              | 61.9                                   | 75.9                                 | 90.8                                   | 4.87                                               | 102.00                                 | 75.90                                | 90.80                                  | 9.37                                 | 30.1                                    |                                                      |                             |
| Telmisartan                        | 40uM          | 19.9                                              | 63.3                                   | 77.3                                 | 84.7                                   | 4.71                                               | 102.00                                 | 77.30                                | 84.70                                  | 15.5                                 | 94.5                                    | 13                                                   | 48                          |
| Tetrabenazine                      | 40uM          | 8.18                                              | 103                                    | 74.4                                 | 85.7                                   | -5.75                                              | 102.00                                 | 74.40                                | 85.70                                  | 19                                   | 29.8                                    |                                                      |                             |
| Tetrabenazine (racemate)           | 40uM          | 12.4                                              | 75.6                                   | 63.3                                 | 71.9                                   | -9.28                                              | 102.00                                 | 63.30                                | 71.90                                  | 14.1                                 | 40.6                                    |                                                      |                             |
| Tyramine                           | 40uM          | -0.338                                            | 68.6                                   | 79.9                                 | 90.4                                   | 0.79                                               | 100.00                                 | 79.90                                | 90.40                                  | 10.4                                 | 48.9                                    |                                                      |                             |
| Ulipristal acetate                 | 40uM          | -3.47                                             | 64.7                                   | 61.8                                 | 61.8                                   | -13.70                                             | 102.00                                 | 62.10                                | 61.80                                  | 5.08                                 | 24.3                                    |                                                      |                             |
| Valdecovib                         | 40uM          | 3.77                                              | 85.8                                   | 79.9                                 | 82.4                                   | -11.10                                             | 98.20                                  | 79.90                                | 82.40                                  | 17.5                                 | 78.5                                    | 1                                                    | 25                          |
| Vardenafil dihydrochloride         | 40uM          | 24.4                                              | 104                                    | 74.1                                 | 83.9                                   | -4.02                                              | 93.80                                  | 74.10                                | 83.90                                  | 5.35                                 | 61.5                                    |                                                      |                             |
| Velpatasvir                        | 40uM          | 1.17                                              | 72.8                                   | 79.5                                 | 89.5                                   | -20.50                                             | 109.00                                 | 79.50                                | 89.50                                  | 40.9                                 | 88.3                                    | 23                                                   | 74                          |
| Vismodegib                         | 40uM          | -1.35                                             | 82.5                                   | 77.4                                 | 83.2                                   | -13.20                                             | 97.30                                  | 77.40                                | 83.20                                  | 4.56                                 | 49.1                                    |                                                      |                             |
| VX661                              | 40uM          | -6.28                                             | 77.3                                   | 78.3                                 | 75.1                                   | -24.90                                             | 101.00                                 | 78.30                                | 75.10                                  | 10.5                                 | 14.3                                    |                                                      |                             |
| Zafirlukast                        | 40uM          | 13.1                                              | 106                                    | 69.9                                 | 80.8                                   | -2.61                                              | 115.00                                 | 69.90                                | 80.80                                  | 21.4                                 | 94.8                                    | 13                                                   | 35                          |
